# Supplementary material for: Solid-State Fermentation of Soybean Meal with Edible Mushroom Mycelium to Improve Its Nutritional, Antioxidant Capacities and Physicochemical Properties
Source: MDPI journal article supplement (doi:10.3390/fermentation9040322), 2023-03-23
Supplement: s1 [file s1]

**Table S1.** The changes in amino acid content of different soybean meal powders.

| Amino acids  | SP<br>( $\mu\text{mol/g}$ )      | SSP<br>( $\mu\text{mol/g}$ )     | PFSP<br>( $\mu\text{mol/g}$ )    | HFSP<br>( $\mu\text{mol/g}$ )    | FFSP<br>( $\mu\text{mol/g}$ )     |
|--------------|----------------------------------|----------------------------------|----------------------------------|----------------------------------|-----------------------------------|
| Asp          | 65.941 $\pm$ 3.474 <sup>c</sup>  | 66.369 $\pm$ 3.612 <sup>c</sup>  | 81.214 $\pm$ 4.772 <sup>a</sup>  | 71.285 $\pm$ 3.305 <sup>b</sup>  | 67.326 $\pm$ 3.640 <sup>c</sup>   |
| Thr          | 24.787 $\pm$ 1.389 <sup>cd</sup> | 24.063 $\pm$ 1.563 <sup>d</sup>  | 29.767 $\pm$ 1.512 <sup>a</sup>  | 26.403 $\pm$ 1.783 <sup>b</sup>  | 25.161 $\pm$ 1.584 <sup>bc</sup>  |
| Glu          | 97.957 $\pm$ 4.103 <sup>c</sup>  | 99.202 $\pm$ 4.385 <sup>bc</sup> | 120.771 $\pm$ 5.450 <sup>a</sup> | 103.449 $\pm$ 5.278 <sup>b</sup> | 101.829 $\pm$ 5.518 <sup>bc</sup> |
| Gly          | 41.176 $\pm$ 2.031 <sup>b</sup>  | 41.145 $\pm$ 2.611 <sup>b</sup>  | 51.526 $\pm$ 2.771 <sup>a</sup>  | 44.346 $\pm$ 2.658 <sup>b</sup>  | 43.409 $\pm$ 2.407 <sup>b</sup>   |
| Ala          | 38.672 $\pm$ 1.514 <sup>c</sup>  | 42.418 $\pm$ 2.784 <sup>bc</sup> | 52.557 $\pm$ 3.531 <sup>a</sup>  | 46.574 $\pm$ 2.508 <sup>ab</sup> | 43.118 $\pm$ 2.743 <sup>b</sup>   |
| Cys          | 32.455 $\pm$ 2.531 <sup>b</sup>  | 33.251 $\pm$ 2.644 <sup>b</sup>  | 40.513 $\pm$ 2.792 <sup>a</sup>  | 35.663 $\pm$ 2.491 <sup>b</sup>  | 34.758 $\pm$ 2.518 <sup>b</sup>   |
| $\beta$ -ala | 24.393 $\pm$ 1.296 <sup>c</sup>  | 27.667 $\pm$ 1.392 <sup>b</sup>  | 32.656 $\pm$ 2.396 <sup>a</sup>  | 29.520 $\pm$ 2.298 <sup>ab</sup> | 27.851 $\pm$ 2.307 <sup>bc</sup>  |
| Lys          | 32.281 $\pm$ 2.342 <sup>a</sup>  | 23.359 $\pm$ 1.432 <sup>b</sup>  | 29.686 $\pm$ 2.472 <sup>a</sup>  | 23.341 $\pm$ 1.310 <sup>b</sup>  | 24.814 $\pm$ 1.487 <sup>b</sup>   |
| His          | 13.354 $\pm$ 1.182 <sup>bc</sup> | 13.409 $\pm$ 1.101 <sup>bc</sup> | 16.844 $\pm$ 1.274 <sup>a</sup>  | 14.693 $\pm$ 1.172 <sup>b</sup>  | 13.870 $\pm$ 1.165 <sup>bc</sup>  |
| Arg          | 32.682 $\pm$ 2.310 <sup>a</sup>  | 27.328 $\pm$ 1.315 <sup>b</sup>  | 34.314 $\pm$ 2.335 <sup>a</sup>  | 28.250 $\pm$ 1.249 <sup>b</sup>  | 27.877 $\pm$ 1.240 <sup>b</sup>   |
| Pro          | 34.866 $\pm$ 2.341 <sup>b</sup>  | 34.840 $\pm$ 2.347 <sup>b</sup>  | 42.657 $\pm$ 2.409 <sup>a</sup>  | 37.902 $\pm$ 2.376 <sup>ab</sup> | 36.636 $\pm$ 2.396 <sup>b</sup>   |

SP: soybean meal powder; SSP: sterilized soybean meal powder; PFSP: *Pleurotus ostreatus* fermented soybean meal powder; HFSP: *Hericium erinaceus* fermented soybean meal powder; FFSP: *Flammulina velutipes* fermented soybean meal powder. Data is mean  $\pm$  SD of triplicates, values in the same row with different letters (a-d) present significant difference ( $p < 0.05$ ).

**Table S2.** The changes in isoflavone content of different soybean meal powders.

| Isoflavone forms | Daidzin<br>( $\mu\text{g/g}$ ) | Genistin<br>( $\mu\text{g/g}$ ) | Daidzein<br>( $\mu\text{g/g}$ ) | Genistein<br>( $\mu\text{g/g}$ ) |
|------------------|--------------------------------|---------------------------------|---------------------------------|----------------------------------|
| SP               | 15.63 $\pm$ 0.71 <sup>c</sup>  | 176.73 $\pm$ 7.16 <sup>b</sup>  | 22.29 $\pm$ 1.33 <sup>c</sup>   | 28.86 $\pm$ 1.40 <sup>d</sup>    |
| SSP              | 39.52 $\pm$ 1.64 <sup>a</sup>  | 286.19 $\pm$ 10.84 <sup>a</sup> | 11.36 $\pm$ 0.30 <sup>d</sup>   | 15.38 $\pm$ 0.53 <sup>e</sup>    |
| PFSP             | 13.78 $\pm$ 0.57 <sup>d</sup>  | n.d.                            | 72.13 $\pm$ 3.32 <sup>a</sup>   | 122.40 $\pm$ 5.42 <sup>a</sup>   |
| HFSP             | 18.53 $\pm$ 0.63 <sup>b</sup>  | n.d.                            | 44.82 $\pm$ 2.27 <sup>b</sup>   | 69.87 $\pm$ 2.59 <sup>c</sup>    |
| FFSP             | 9.36 $\pm$ 0.35 <sup>e</sup>   | n.d.                            | 47.70 $\pm$ 2.04 <sup>b</sup>   | 89.94 $\pm$ 3.61 <sup>b</sup>    |

SP: soybean meal powder; SSP: sterilized soybean meal powder; PFSP: *Pleurotus ostreatus* fermented soybean meal powder; HFSP: *Hericium erinaceus* fermented soybean meal powder; FFSP: *Flammulina velutipes* fermented soybean meal powder; n.d.: not detected Data is mean  $\pm$  SD of triplicates, values in the same column with different letters (a-e) present significant difference ( $p < 0.05$ ).
